# Supplementary material
Source: PubMed Central journal article supplement (PMC2782276)
Supplement: tpc.109.070771_1.pdf [file tpc.109.070771_1.pdf]

Supplemental Data. Yamaji et al. (2009). A Zn-finger transcription factor ART1 regulates multiple genes implicated in aluminum tolerance in rice.

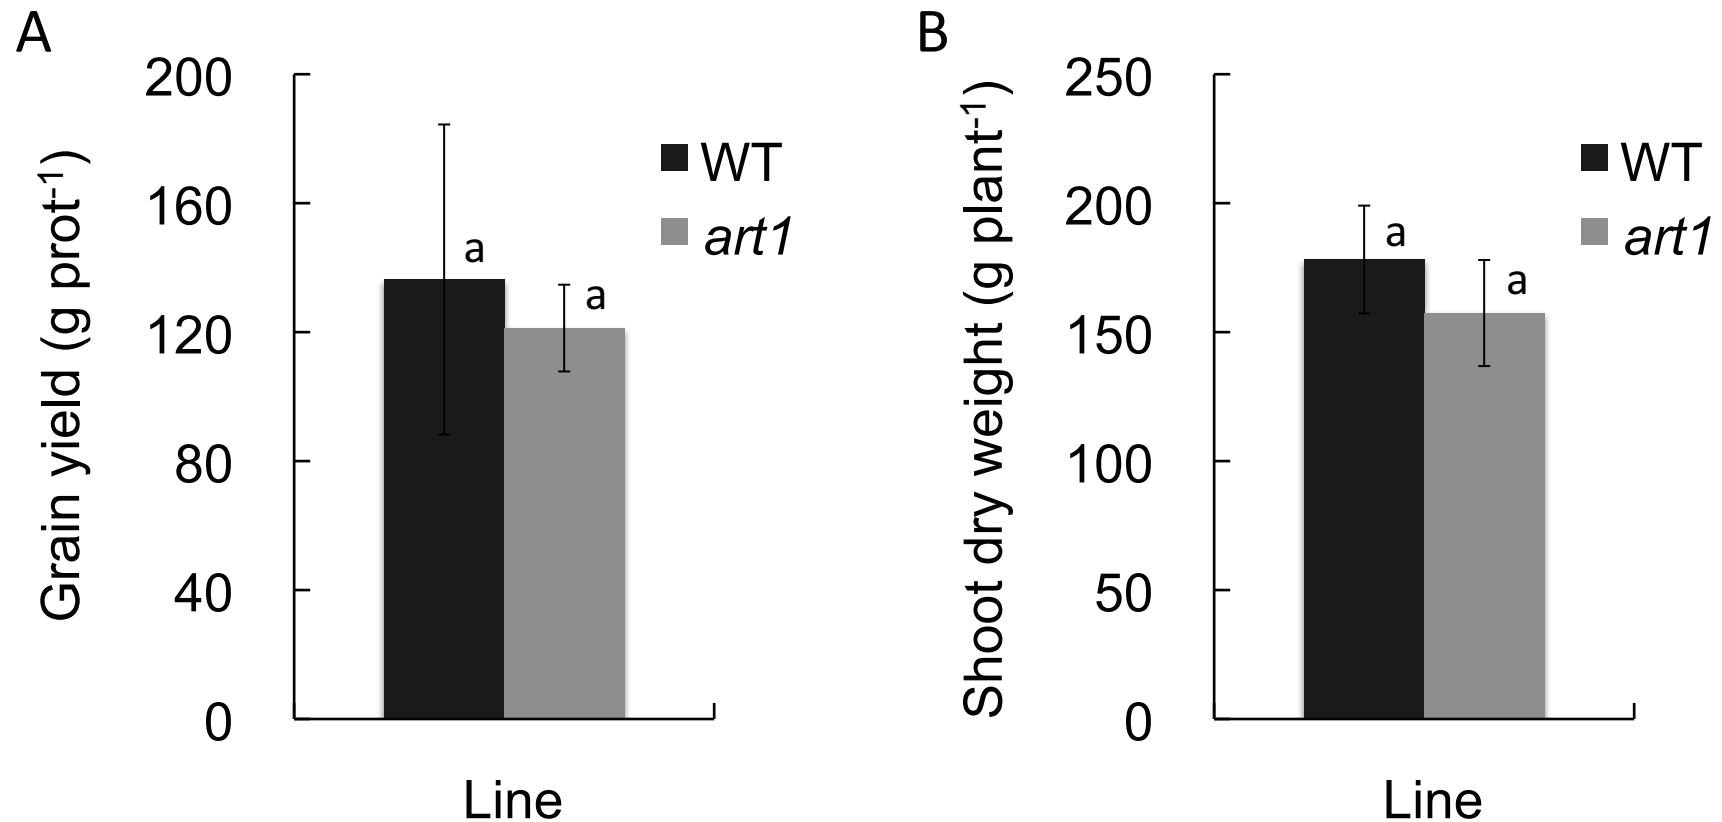

**Supplemental Figure 1.** Air-dried weight of shoot and grain yield of both WT rice and *art1* grown in a field. Both WT rice (cv. Koshihikari) and *art1* mutant were cultivated in a field (soil pH 6.5) at an experimental farm of Okayama University in 2006. Three replicates of a plot (1 m × 0.4 m) were made for each line. Plant growth and yield were investigated at harvest. (A) Grain yield. (B) Shoot dry weight. Data are means ± SD (n = 3 biological replicates). Same letters indicate no significant differences at P > 0.05 by Student t test.

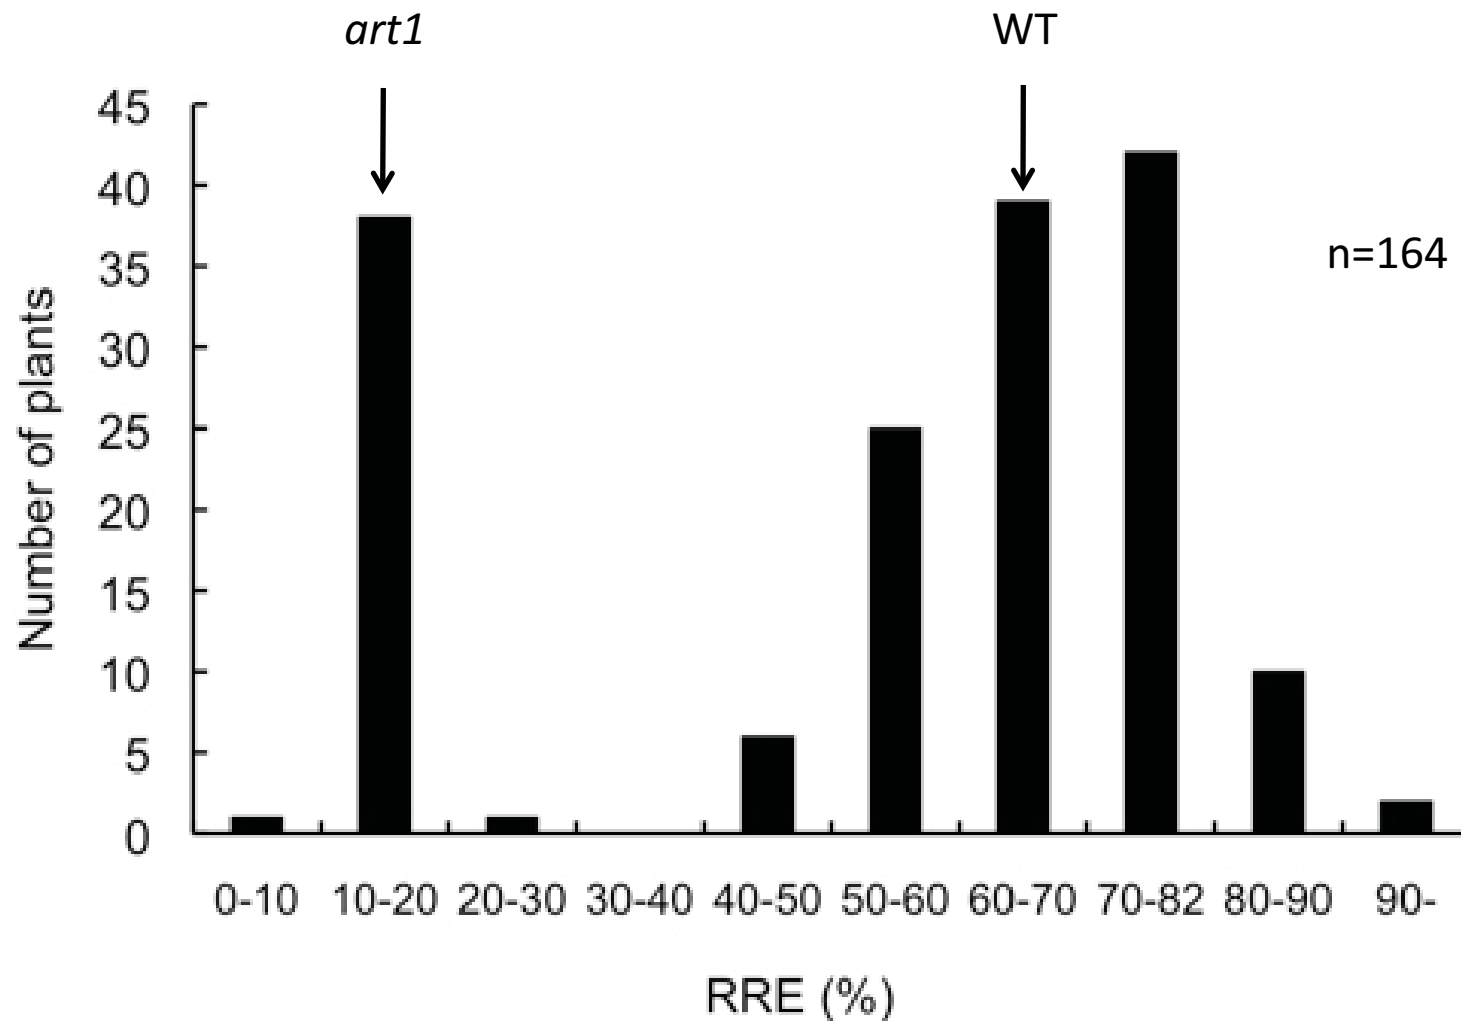

**Supplemental Figure 2.** Frequency distributions of Al sensitivities in an F<sub>2</sub> population from a backcross between the mutant (*art1*) and WT.

Four-day-old seedlings were exposed to a 0.5 mM CaCl<sub>2</sub> solution (pH 4.5) for 24 h and then transferred to 20 μM Al solution containing 0.5 mM CaCl<sub>2</sub> (pH 4.5) for a further 24 h. Relative root elongation (RRE) used for evaluation of their sensitivities to Al was calculated as: root elongation with Al / root elongation without Al × 100.



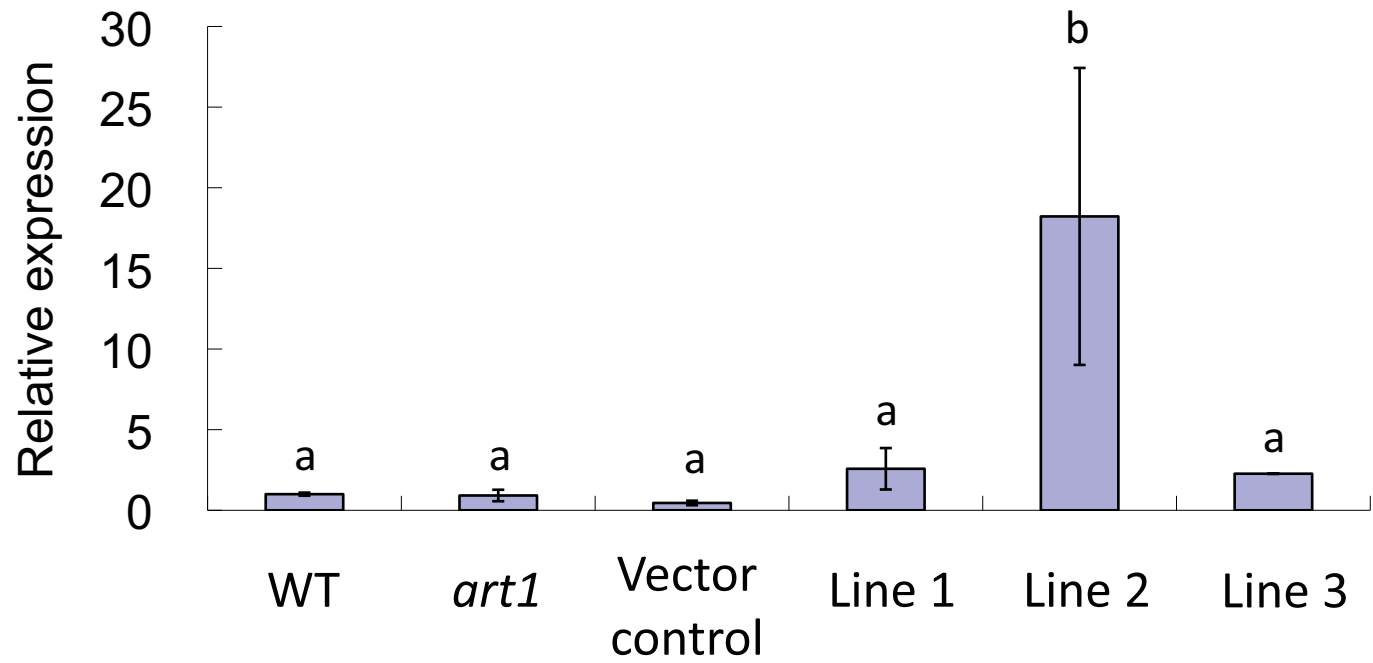

**Supplemental Figure 4.** Expression levels of *ART1/art1* in complementation lines and the control plants. Root of WT rice (cv. Koshihikari), *art1* mutant, three independent transgenic complementation lines with genomic fragment of *ART1* (Line 1 to 3) and vector control line of complementation test were used for quantitative RT-PCR to determine relative expression of *ART1/art1*. Histone H3 was used as an internal control. These expression levels include both endogenous *ART1/art1* and transgenic *ART1*. Data are means  $\pm$  SD (n = 3 biological replicates). Different letters indicate significant differences at P < 0.05 by Tukey's test.

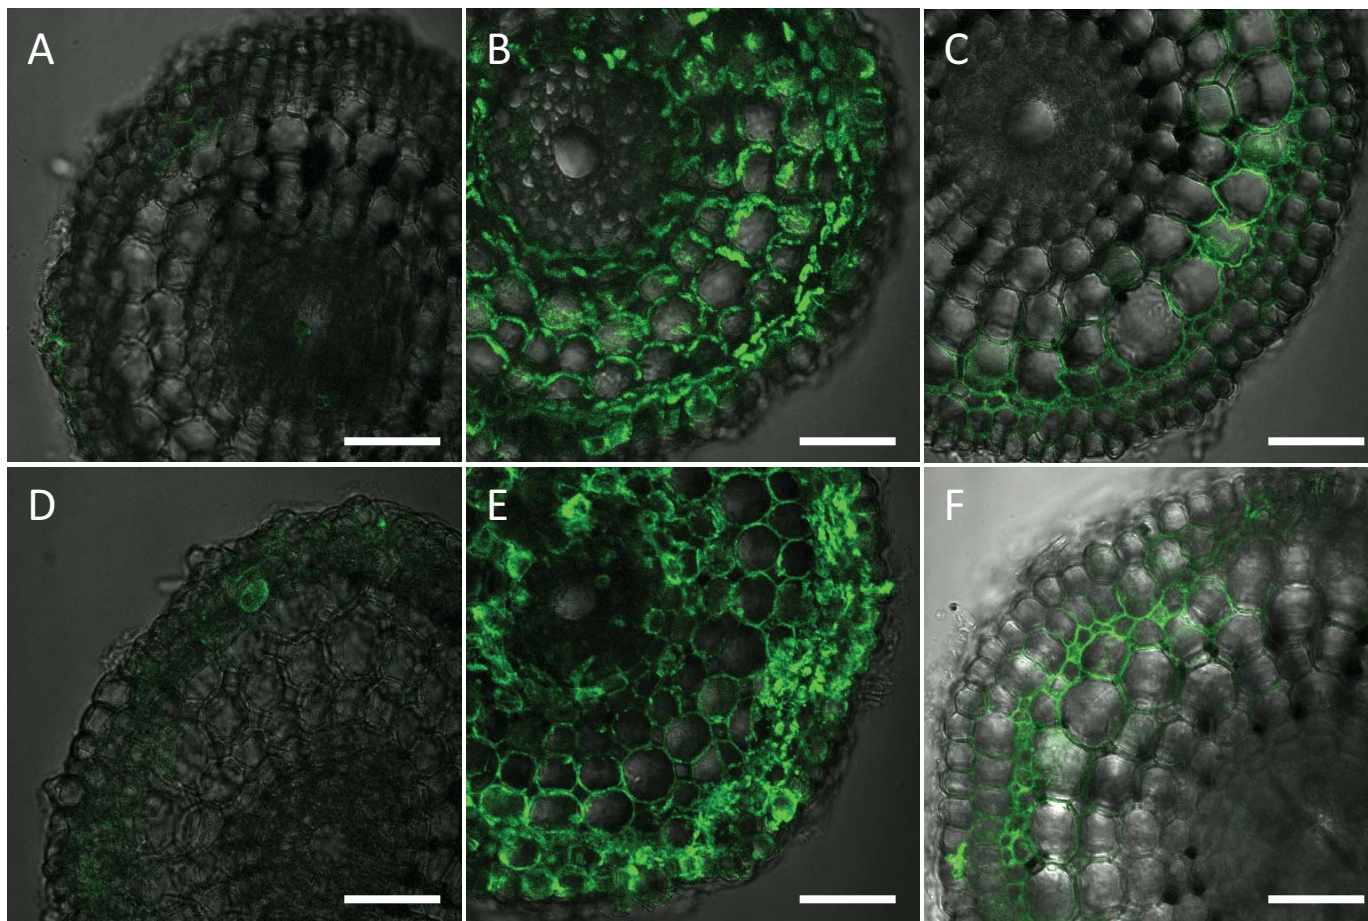

WT

*star1*

*art1*

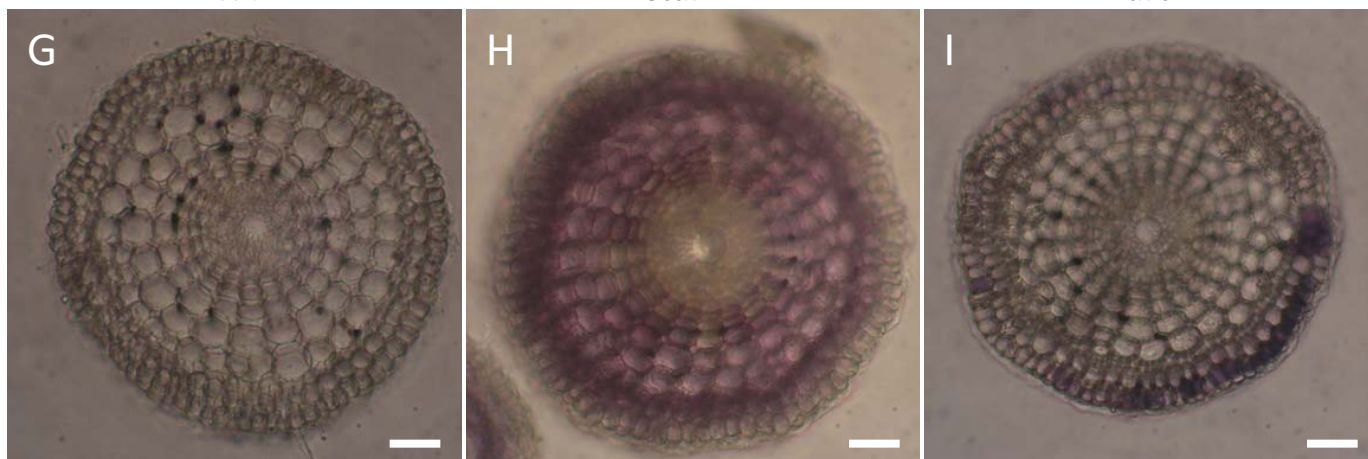

G

H

I

**Supplemental Figure 5.** Root Al staining in WT(A,D,G), *star1* (B,E,H) and *art1* (C,F,I). Four-day-old seedlings were exposed to 30  $\mu$ M Al in 0.5 mM  $\text{CaCl}_2$  solution (pH 4.5) for 9 h (A-C) or 24 h (D-I) and then free-hand cross sections at 2 mm from the root tip were stained by Morin (A-F) or Eriochrome cyanine R. Bars = 50  $\mu$ m.

**Supplemental Table 1.** Primers for InDel markers used in mapping ART1

| <b>Primer Name</b> | <b>Forward (5'-----3')</b> | <b>Reverse (5'-----3')</b> |
|--------------------|----------------------------|----------------------------|
| C62896             | GAGAAATCAAATCGGGCCAC       | AAGGGCAAGATGCATTGAC        |
| MaOs1210           | CGCAGGGAAGCAAAATTAAC       | CACCTTATGGAGCATTGAGTTGTA   |
| MaOs1219           | CCCATGTAGAAGCCAAAGATAAG    | CGTTGGATGATGATGGAAGG       |
| MaOs1221           | CTGCCTGCTGGATAGGACTTT      | GTTTTCGCTGGATCTTTTGGTA     |
| MaOs1229           | TTCCTCATGGGATCACTTGC       | TGGTGCATCAGCCATAAACT       |
| MaOs1237           | GGCTACACTTATTTTGCAGC       | ACCTCCAACACTCCCACTCACC     |
| MaOs1239           | TGAGGGCACAAATGAATGG        | AAATCTGACGAGCGACAAAAG      |
| MaOs1244           | TTATTCCACCAAAGATTAAGGG     | GGTTCTGATTCCAAGTCACAGG     |
| MaOs1246           | TTACGGTCAACAATTCACCAA      | CAAGAATTTAGAAACGAAAGGGAG   |
| MaOs1248           | GCCCGCTTCTTCTTGTGG         | CCTCCGTCCTCTGGTGCTAC       |
| MaOs1249           | GAGCATTGCCCTTTTACACC       | CCACTGGGATTCTCACTTCG       |
| MaOs1250           | GTTTCATAGGGCAAATGGTTAAG    | TACCGAGCAGGCGAGTAGG        |
